# Supplementary material for: 18F-Labeled magnetic nanovectors for bimodal cellular imaging
Source: Royal Society of Chemistry journal article supplement (doi:10.1039/d1bm00616a), 2021-01-01
Supplement: d1bm00616a1.pdf [file d1bm00616a1.pdf]

## Supporting Information

# <sup>18</sup>F Labeled Magnetic Nanovectors for Bimodal Cellular Imaging

Markus B. Schütz,<sup>a</sup> Alexander M. Renner,<sup>a</sup> Shaista Ilyas,<sup>a</sup> Khan Lê,<sup>a</sup> Mehrab Guliyev,<sup>b</sup> Philipp Krapf,<sup>b</sup> Bernd Neumaier<sup>b</sup> and Sanjay Mathur<sup>a,\*</sup>

a. Institute of Inorganic Chemistry, University of Cologne, D-50939 Cologne, Germany.

b. Institute of Neuroscience and Medicine-Nuclear Chemistry (INM-5), Forschungszentrum Jülich, D-52428 Jülich, Germany.

\*Correspondence: sanjay.mathur@uni-koeln.de Tel: +49 221 470 5627

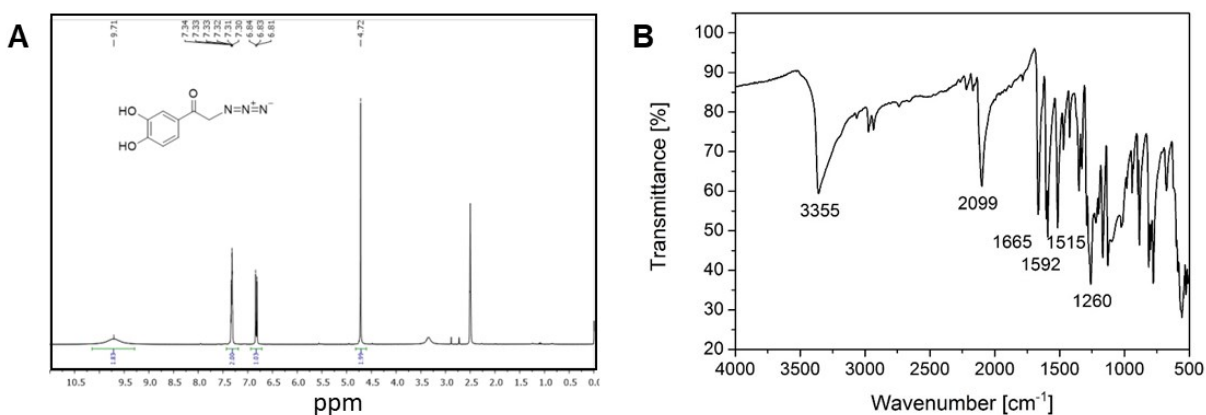

Fig. S11: (A) <sup>1</sup>H-NMR and (B) IR spectrum of 4-(azidoacetyl)catechol.
